# Supplementary material for: Snow depth on Arctic sea ice from historical in situ data
Source: Copernicus journal article supplement (doi:10.5194/tc-12-1867-2018), 2018-06-05
Supplement: Supplementary file 1 [file grid_data.xlsx]

## Sheet: Export_Output
X	Y	snow depth in cm			X and Y = centers of the 100000x100000 m cells
319391	2.59876e+06	23			columns : 29
419391	2.59876e+06	25			rows : 46
519391	2.59876e+06	26			ref. system : North Pole Stereographic
319391	2.49876e+06	24			ref. units : m
419391	2.49876e+06	25			min. X : -930608.8585797
519391	2.49876e+06	27			max. X : 1969391.1414203
619391	2.49876e+06	28			min. Y : -1951236.9412195
219391	2.39876e+06	21			max. Y : 2648763.0587805
319391	2.39876e+06	23
419391	2.39876e+06	24			false easting	0
519391	2.39876e+06	26			false northing	0
619391	2.39876e+06	27			central meridian	20
719391	2.39876e+06	28			scale factor	1
219391	2.29876e+06	22			latitude of origin	90
319391	2.29876e+06	23			datum	WGS_1984
419391	2.29876e+06	24
519391	2.29876e+06	26
619391	2.29876e+06	27
719391	2.29876e+06	27
119391	2.19876e+06	22
219391	2.19876e+06	22
319391	2.19876e+06	23
419391	2.19876e+06	24
519391	2.19876e+06	25
619391	2.19876e+06	26
719391	2.19876e+06	26
819391	2.19876e+06	26
119391	2.09876e+06	23
219391	2.09876e+06	23
319391	2.09876e+06	24
419391	2.09876e+06	25
519391	2.09876e+06	25
619391	2.09876e+06	25
719391	2.09876e+06	25
819391	2.09876e+06	26
919391	2.09876e+06	26
19391.1	1.99876e+06	24
119391	1.99876e+06	24
219391	1.99876e+06	25
319391	1.99876e+06	25
419391	1.99876e+06	26
519391	1.99876e+06	26
619391	1.99876e+06	26
719391	1.99876e+06	26
819391	1.99876e+06	25
919391	1.99876e+06	25
1.01939e+06	1.99876e+06	25
1.11939e+06	1.99876e+06	26
1.21939e+06	1.99876e+06	27
-80608.9	1.89876e+06	28
19391.1	1.89876e+06	27
119391	1.89876e+06	26
219391	1.89876e+06	26
319391	1.89876e+06	27
419391	1.89876e+06	27
519391	1.89876e+06	27
619391	1.89876e+06	27
719391	1.89876e+06	27
819391	1.89876e+06	26
919391	1.89876e+06	26
1.01939e+06	1.89876e+06	26
1.11939e+06	1.89876e+06	26
1.21939e+06	1.89876e+06	26
-480609	1.79876e+06	31
-380609	1.79876e+06	32
-280609	1.79876e+06	31
-180609	1.79876e+06	31
-80608.9	1.79876e+06	30
19391.1	1.79876e+06	29
119391	1.79876e+06	28
219391	1.79876e+06	28
319391	1.79876e+06	28
419391	1.79876e+06	29
519391	1.79876e+06	29
619391	1.79876e+06	29
719391	1.79876e+06	28
819391	1.79876e+06	27
919391	1.79876e+06	27
1.01939e+06	1.79876e+06	26
1.11939e+06	1.79876e+06	26
1.21939e+06	1.79876e+06	26
1.31939e+06	1.79876e+06	26
1.41939e+06	1.79876e+06	25
-780609	1.69876e+06	29
-680609	1.69876e+06	29
-580609	1.69876e+06	30
-480609	1.69876e+06	31
-380609	1.69876e+06	32
-280609	1.69876e+06	32
-180609	1.69876e+06	32
-80608.9	1.69876e+06	31
19391.1	1.69876e+06	30
119391	1.69876e+06	29
219391	1.69876e+06	29
319391	1.69876e+06	30
419391	1.69876e+06	30
519391	1.69876e+06	31
619391	1.69876e+06	30
719391	1.69876e+06	30
819391	1.69876e+06	29
919391	1.69876e+06	28
1.01939e+06	1.69876e+06	28
1.11939e+06	1.69876e+06	27
1.21939e+06	1.69876e+06	27
1.31939e+06	1.69876e+06	27
1.41939e+06	1.69876e+06	27
-880609	1.59876e+06	28
-780609	1.59876e+06	29
-680609	1.59876e+06	29
-580609	1.59876e+06	30
-480609	1.59876e+06	31
-380609	1.59876e+06	32
-280609	1.59876e+06	32
-180609	1.59876e+06	32
-80608.9	1.59876e+06	32
19391.1	1.59876e+06	31
119391	1.59876e+06	31
219391	1.59876e+06	31
319391	1.59876e+06	31
419391	1.59876e+06	32
519391	1.59876e+06	32
619391	1.59876e+06	32
719391	1.59876e+06	31
819391	1.59876e+06	31
919391	1.59876e+06	30
1.01939e+06	1.59876e+06	29
1.11939e+06	1.59876e+06	29
1.21939e+06	1.59876e+06	29
1.31939e+06	1.59876e+06	28
1.41939e+06	1.59876e+06	28
-880609	1.49876e+06	28
-780609	1.49876e+06	28
-680609	1.49876e+06	29
-580609	1.49876e+06	30
-480609	1.49876e+06	31
-380609	1.49876e+06	32
-280609	1.49876e+06	32
-180609	1.49876e+06	32
-80608.9	1.49876e+06	32
19391.1	1.49876e+06	31
119391	1.49876e+06	31
219391	1.49876e+06	31
319391	1.49876e+06	32
419391	1.49876e+06	33
519391	1.49876e+06	33
619391	1.49876e+06	33
719391	1.49876e+06	33
819391	1.49876e+06	32
919391	1.49876e+06	31
1.01939e+06	1.49876e+06	31
1.11939e+06	1.49876e+06	30
1.21939e+06	1.49876e+06	29
1.31939e+06	1.49876e+06	29
1.41939e+06	1.49876e+06	29
-780609	1.39876e+06	29
-680609	1.39876e+06	29
-580609	1.39876e+06	30
-480609	1.39876e+06	32
-380609	1.39876e+06	33
-280609	1.39876e+06	32
-180609	1.39876e+06	32
-80608.9	1.39876e+06	32
19391.1	1.39876e+06	32
119391	1.39876e+06	32
219391	1.39876e+06	32
319391	1.39876e+06	33
419391	1.39876e+06	34
519391	1.39876e+06	35
619391	1.39876e+06	35
719391	1.39876e+06	34
819391	1.39876e+06	34
919391	1.39876e+06	33
1.01939e+06	1.39876e+06	32
1.11939e+06	1.39876e+06	31
1.21939e+06	1.39876e+06	30
1.31939e+06	1.39876e+06	29
1.41939e+06	1.39876e+06	29
1.51939e+06	1.39876e+06	28
-680609	1.29876e+06	30
-580609	1.29876e+06	30
-480609	1.29876e+06	31
-380609	1.29876e+06	32
-280609	1.29876e+06	32
-180609	1.29876e+06	32
-80608.9	1.29876e+06	31
19391.1	1.29876e+06	31
119391	1.29876e+06	32
219391	1.29876e+06	32
319391	1.29876e+06	33
419391	1.29876e+06	34
519391	1.29876e+06	35
619391	1.29876e+06	36
719391	1.29876e+06	36
819391	1.29876e+06	35
919391	1.29876e+06	34
1.01939e+06	1.29876e+06	32
1.11939e+06	1.29876e+06	31
1.21939e+06	1.29876e+06	29
1.31939e+06	1.29876e+06	28
1.41939e+06	1.29876e+06	28
1.51939e+06	1.29876e+06	28
-680609	1.19876e+06	29
-580609	1.19876e+06	30
-480609	1.19876e+06	31
-380609	1.19876e+06	32
-280609	1.19876e+06	32
-180609	1.19876e+06	32
-80608.9	1.19876e+06	31
19391.1	1.19876e+06	32
119391	1.19876e+06	32
219391	1.19876e+06	33
319391	1.19876e+06	34
419391	1.19876e+06	35
519391	1.19876e+06	36
619391	1.19876e+06	36
719391	1.19876e+06	36
819391	1.19876e+06	36
919391	1.19876e+06	34
1.01939e+06	1.19876e+06	33
1.11939e+06	1.19876e+06	30
1.21939e+06	1.19876e+06	29
1.31939e+06	1.19876e+06	27
1.41939e+06	1.19876e+06	27
1.51939e+06	1.19876e+06	28
1.61939e+06	1.19876e+06	29
-780609	1.09876e+06	29
-680609	1.09876e+06	29
-580609	1.09876e+06	30
-480609	1.09876e+06	31
-380609	1.09876e+06	32
-280609	1.09876e+06	32
-180609	1.09876e+06	32
-80608.9	1.09876e+06	32
19391.1	1.09876e+06	32
119391	1.09876e+06	33
219391	1.09876e+06	33
319391	1.09876e+06	34
419391	1.09876e+06	34
519391	1.09876e+06	35
619391	1.09876e+06	36
719391	1.09876e+06	36
819391	1.09876e+06	36
919391	1.09876e+06	35
1.01939e+06	1.09876e+06	32
1.11939e+06	1.09876e+06	30
1.21939e+06	1.09876e+06	28
1.31939e+06	1.09876e+06	27
1.41939e+06	1.09876e+06	27
1.51939e+06	1.09876e+06	28
1.61939e+06	1.09876e+06	29
1.71939e+06	1.09876e+06	29
-780609	998763	29
-680609	998763	30
-580609	998763	30
-480609	998763	31
-380609	998763	32
-280609	998763	33
-180609	998763	33
-80608.9	998763	33
19391.1	998763	33
119391	998763	33
219391	998763	33
319391	998763	33
419391	998763	34
519391	998763	34
619391	998763	35
719391	998763	36
819391	998763	36
919391	998763	34
1.01939e+06	998763	32
1.11939e+06	998763	29
1.21939e+06	998763	27
1.31939e+06	998763	26
1.41939e+06	998763	26
1.51939e+06	998763	26
1.61939e+06	998763	27
1.71939e+06	998763	28
-780609	898763	29
-680609	898763	30
-580609	898763	30
-480609	898763	31
-380609	898763	33
-280609	898763	33
-180609	898763	34
-80608.9	898763	34
19391.1	898763	33
119391	898763	33
219391	898763	32
319391	898763	32
419391	898763	32
519391	898763	33
619391	898763	34
719391	898763	35
819391	898763	35
919391	898763	34
1.01939e+06	898763	31
1.11939e+06	898763	28
1.21939e+06	898763	26
1.31939e+06	898763	25
1.41939e+06	898763	24
1.51939e+06	898763	25
1.61939e+06	898763	26
1.71939e+06	898763	26
1.81939e+06	898763	27
-880609	798763	29
-780609	798763	29
-680609	798763	30
-580609	798763	30
-480609	798763	32
-380609	798763	33
-280609	798763	34
-180609	798763	35
-80608.9	798763	34
19391.1	798763	34
119391	798763	33
219391	798763	32
319391	798763	31
419391	798763	32
519391	798763	32
619391	798763	34
719391	798763	34
819391	798763	34
919391	798763	33
1.01939e+06	798763	30
1.11939e+06	798763	27
1.21939e+06	798763	24
1.31939e+06	798763	23
1.41939e+06	798763	22
1.51939e+06	798763	22
1.61939e+06	798763	23
1.71939e+06	798763	23
1.81939e+06	798763	24
1.91939e+06	798763	22
-880609	698763	29
-780609	698763	29
-680609	698763	29
-580609	698763	30
-480609	698763	32
-380609	698763	34
-280609	698763	35
-180609	698763	35
-80608.9	698763	35
19391.1	698763	34
119391	698763	33
219391	698763	32
319391	698763	32
419391	698763	32
519391	698763	33
619391	698763	34
719391	698763	35
819391	698763	34
919391	698763	31
1.01939e+06	698763	28
1.11939e+06	698763	25
1.21939e+06	698763	22
1.31939e+06	698763	21
1.41939e+06	698763	21
1.51939e+06	698763	21
1.61939e+06	698763	21
1.71939e+06	698763	21
1.81939e+06	698763	21
1.91939e+06	698763	21
-880609	598763	28
-780609	598763	28
-680609	598763	29
-580609	598763	31
-480609	598763	33
-380609	598763	35
-280609	598763	36
-180609	598763	36
-80608.9	598763	35
19391.1	598763	34
119391	598763	33
219391	598763	33
319391	598763	32
419391	598763	33
519391	598763	33
619391	598763	34
719391	598763	34
819391	598763	33
919391	598763	30
1.01939e+06	598763	27
1.11939e+06	598763	24
1.21939e+06	598763	21
1.31939e+06	598763	19
1.41939e+06	598763	19
1.51939e+06	598763	19
1.61939e+06	598763	19
1.71939e+06	598763	19
1.81939e+06	598763	19
-780609	498763	27
-680609	498763	29
-580609	498763	31
-480609	498763	33
-380609	498763	35
-280609	498763	36
-180609	498763	36
-80608.9	498763	36
19391.1	498763	35
119391	498763	34
219391	498763	34
319391	498763	33
419391	498763	34
519391	498763	34
619391	498763	35
719391	498763	35
819391	498763	32
919391	498763	30
1.01939e+06	498763	26
1.11939e+06	498763	23
1.21939e+06	498763	20
1.31939e+06	498763	18
1.41939e+06	498763	17
1.51939e+06	498763	17
1.61939e+06	498763	18
1.71939e+06	498763	18
1.81939e+06	498763	18
-780609	398763	27
-680609	398763	28
-580609	398763	31
-480609	398763	33
-380609	398763	35
-280609	398763	36
-180609	398763	36
-80608.9	398763	36
19391.1	398763	35
119391	398763	34
219391	398763	34
319391	398763	34
419391	398763	34
519391	398763	35
619391	398763	35
719391	398763	35
819391	398763	32
919391	398763	29
1.01939e+06	398763	26
1.11939e+06	398763	23
1.21939e+06	398763	19
1.31939e+06	398763	18
1.41939e+06	398763	17
1.51939e+06	398763	17
1.61939e+06	398763	17
1.71939e+06	398763	17
1.81939e+06	398763	18
-780609	298763	26
-680609	298763	28
-580609	298763	30
-480609	298763	33
-380609	298763	35
-280609	298763	36
-180609	298763	36
-80608.9	298763	36
19391.1	298763	35
119391	298763	35
219391	298763	35
319391	298763	34
419391	298763	35
519391	298763	35
619391	298763	35
719391	298763	35
819391	298763	32
919391	298763	29
1.01939e+06	298763	25
1.11939e+06	298763	22
1.21939e+06	298763	20
1.31939e+06	298763	18
1.41939e+06	298763	17
1.51939e+06	298763	17
1.61939e+06	298763	17
1.71939e+06	298763	17
1.81939e+06	298763	17
-680609	198763	29
-580609	198763	30
-480609	198763	33
-380609	198763	35
-280609	198763	36
-180609	198763	36
-80608.9	198763	36
19391.1	198763	36
119391	198763	35
219391	198763	35
319391	198763	34
419391	198763	34
519391	198763	34
619391	198763	34
719391	198763	34
819391	198763	32
919391	198763	29
1.01939e+06	198763	25
1.11939e+06	198763	23
1.21939e+06	198763	21
1.31939e+06	198763	19
1.41939e+06	198763	18
1.51939e+06	198763	17
1.61939e+06	198763	18
1.71939e+06	198763	17
1.81939e+06	198763	17
-580609	98763.1	31
-480609	98763.1	33
-380609	98763.1	34
-280609	98763.1	35
-180609	98763.1	35
-80608.9	98763.1	35
19391.1	98763.1	35
119391	98763.1	35
219391	98763.1	35
319391	98763.1	33
419391	98763.1	33
519391	98763.1	33
619391	98763.1	33
719391	98763.1	33
819391	98763.1	32
919391	98763.1	29
1.01939e+06	98763.1	26
1.11939e+06	98763.1	24
1.21939e+06	98763.1	22
1.31939e+06	98763.1	21
1.41939e+06	98763.1	21
1.51939e+06	98763.1	20
1.61939e+06	98763.1	20
1.71939e+06	98763.1	19
1.81939e+06	98763.1	19
-580609	-1236.94	32
-480609	-1236.94	33
-380609	-1236.94	34
-280609	-1236.94	35
-180609	-1236.94	35
-80608.9	-1236.94	35
19391.1	-1236.94	35
119391	-1236.94	34
219391	-1236.94	34
319391	-1236.94	33
419391	-1236.94	32
519391	-1236.94	32
619391	-1236.94	33
719391	-1236.94	33
819391	-1236.94	31
919391	-1236.94	30
1.01939e+06	-1236.94	28
1.11939e+06	-1236.94	26
1.21939e+06	-1236.94	24
1.31939e+06	-1236.94	23
1.41939e+06	-1236.94	24
-480609	-101237	34
-380609	-101237	34
-280609	-101237	34
-180609	-101237	34
-80608.9	-101237	35
19391.1	-101237	34
119391	-101237	34
219391	-101237	34
319391	-101237	33
419391	-101237	32
519391	-101237	32
619391	-101237	32
719391	-101237	32
819391	-101237	31
919391	-101237	30
1.01939e+06	-101237	28
1.11939e+06	-101237	27
1.21939e+06	-101237	26
1.31939e+06	-101237	27
1.41939e+06	-101237	28
1.51939e+06	-101237	28
-580609	-201237	36
-480609	-201237	36
-380609	-201237	35
-280609	-201237	35
-180609	-201237	34
-80608.9	-201237	34
19391.1	-201237	34
119391	-201237	34
219391	-201237	34
319391	-201237	33
419391	-201237	32
519391	-201237	32
619391	-201237	32
719391	-201237	31
819391	-201237	30
919391	-201237	29
1.01939e+06	-201237	28
1.11939e+06	-201237	27
1.21939e+06	-201237	27
1.31939e+06	-201237	28
1.41939e+06	-201237	31
1.51939e+06	-201237	31
-580609	-301237	37
-480609	-301237	37
-380609	-301237	37
-280609	-301237	36
-180609	-301237	36
-80608.9	-301237	36
19391.1	-301237	35
119391	-301237	34
219391	-301237	34
319391	-301237	33
419391	-301237	32
519391	-301237	31
619391	-301237	30
719391	-301237	30
819391	-301237	29
919391	-301237	28
1.01939e+06	-301237	27
1.11939e+06	-301237	26
1.21939e+06	-301237	27
1.31939e+06	-301237	29
1.41939e+06	-301237	33
1.51939e+06	-301237	34
-480609	-401237	38
-380609	-401237	38
-280609	-401237	38
-180609	-401237	38
-80608.9	-401237	37
19391.1	-401237	35
119391	-401237	34
219391	-401237	33
319391	-401237	32
419391	-401237	31
519391	-401237	30
619391	-401237	29
719391	-401237	28
819391	-401237	27
919391	-401237	27
1.01939e+06	-401237	25
1.11939e+06	-401237	25
1.21939e+06	-401237	26
1.31939e+06	-401237	28
1.41939e+06	-401237	31
1.51939e+06	-401237	33
-480609	-501237	40
-380609	-501237	40
-280609	-501237	41
-180609	-501237	40
-80608.9	-501237	39
19391.1	-501237	37
119391	-501237	35
219391	-501237	33
319391	-501237	32
419391	-501237	31
519391	-501237	29
619391	-501237	28
719391	-501237	26
819391	-501237	25
919391	-501237	24
1.01939e+06	-501237	23
1.11939e+06	-501237	23
1.21939e+06	-501237	24
1.31939e+06	-501237	26
1.41939e+06	-501237	28
1.51939e+06	-501237	29
-480609	-601237	42
-380609	-601237	42
-280609	-601237	43
-180609	-601237	41
-80608.9	-601237	40
19391.1	-601237	38
119391	-601237	36
219391	-601237	34
319391	-601237	31
419391	-601237	30
519391	-601237	28
619391	-601237	27
719391	-601237	25
819391	-601237	24
919391	-601237	23
1.01939e+06	-601237	21
1.11939e+06	-601237	21
1.21939e+06	-601237	22
1.31939e+06	-601237	23
1.41939e+06	-601237	24
1.51939e+06	-601237	25
-380609	-701237	44
-280609	-701237	44
-180609	-701237	43
-80608.9	-701237	42
19391.1	-701237	40
119391	-701237	37
219391	-701237	33
319391	-701237	31
419391	-701237	30
519391	-701237	28
619391	-701237	26
719391	-701237	25
819391	-701237	24
919391	-701237	22
1.01939e+06	-701237	20
1.11939e+06	-701237	20
1.21939e+06	-701237	20
1.31939e+06	-701237	20
1.41939e+06	-701237	21
1.51939e+06	-701237	21
-380609	-801237	45
-280609	-801237	46
-180609	-801237	45
-80608.9	-801237	43
19391.1	-801237	40
119391	-801237	36
219391	-801237	32
319391	-801237	29
419391	-801237	29
519391	-801237	28
719391	-801237	25
819391	-801237	23
919391	-801237	21
1.01939e+06	-801237	19
1.11939e+06	-801237	19
1.21939e+06	-801237	18
1.31939e+06	-801237	18
1.41939e+06	-801237	18
1.51939e+06	-801237	18
1.61939e+06	-801237	19
-280609	-901237	47
-180609	-901237	46
-80608.9	-901237	44
19391.1	-901237	40
119391	-901237	35
219391	-901237	31
319391	-901237	29
419391	-901237	28
819391	-901237	23
919391	-901237	21
1.01939e+06	-901237	19
1.11939e+06	-901237	18
1.21939e+06	-901237	17
1.31939e+06	-901237	16
1.41939e+06	-901237	16
1.51939e+06	-901237	16
1.61939e+06	-901237	17
-80608.9	-1.00124e+06	42
19391.1	-1.00124e+06	37
119391	-1.00124e+06	33
219391	-1.00124e+06	29
319391	-1.00124e+06	26
419391	-1.00124e+06	26
1.11939e+06	-1.00124e+06	18
1.21939e+06	-1.00124e+06	17
1.31939e+06	-1.00124e+06	17
1.41939e+06	-1.00124e+06	16
1.51939e+06	-1.00124e+06	16
119391	-1.10124e+06	32
219391	-1.10124e+06	28
319391	-1.10124e+06	25
1.21939e+06	-1.10124e+06	18
1.31939e+06	-1.10124e+06	17
1.41939e+06	-1.10124e+06	17
1.51939e+06	-1.10124e+06	17
1.11939e+06	-1.20124e+06	20
1.21939e+06	-1.20124e+06	20
1.31939e+06	-1.20124e+06	19
1.41939e+06	-1.20124e+06	18
1.11939e+06	-1.30124e+06	23
1.21939e+06	-1.30124e+06	23
1.31939e+06	-1.30124e+06	20
1.41939e+06	-1.30124e+06	19
1.51939e+06	-1.30124e+06	18
1.11939e+06	-1.40124e+06	27
1.21939e+06	-1.40124e+06	25
1.31939e+06	-1.40124e+06	22
1.41939e+06	-1.40124e+06	20
1.51939e+06	-1.40124e+06	19
1.11939e+06	-1.50124e+06	30
1.21939e+06	-1.50124e+06	29
1.31939e+06	-1.50124e+06	24
1.41939e+06	-1.50124e+06	21
1.51939e+06	-1.50124e+06	19
1.61939e+06	-1.50124e+06	18
1.21939e+06	-1.60124e+06	28
1.31939e+06	-1.60124e+06	23
1.41939e+06	-1.60124e+06	20
1.51939e+06	-1.60124e+06	19
1.61939e+06	-1.60124e+06	18
1.71939e+06	-1.60124e+06	18
1.31939e+06	-1.70124e+06	23
1.41939e+06	-1.70124e+06	20
1.51939e+06	-1.70124e+06	18
1.31939e+06	-1.80124e+06	20
1.41939e+06	-1.80124e+06	18
