# Supplementary material for: Snow depth on Arctic sea ice from historical in situ data
Source: Copernicus journal article supplement (doi:10.5194/tc-12-1867-2018), 2018-06-05
Supplement: Supplementary file [file tc-12-1867-2018-supplement-title-page.pdf › tc-12-1867-2018-supplement-title-page.pdf]

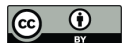

## *Supplement of*

# **Snow depth on Arctic sea ice from historical in situ data**

**Elena V. Shalina and Stein Sandven**

*Correspondence to:* Elena V. Shalina ([elena.shalina@niersc.spb.ru](mailto:elena.shalina@niersc.spb.ru))

- [tc-12-1867-2018-supplement-title-page.pdf](#)
- [grid\\_data.xlsx](#)
- [grid\\_snow\\_depth.png](#)
- [grid\\_snow\\_depth.tif](#)

The copyright of individual parts of the supplement might differ from the CC BY 4.0 License.
